# Supplementary material for: Cryo-EM structure of the adenosine A2A receptor coupled to an engineered heterotrimeric G protein
Source: eLife journal article supplement (doi:10.7554/elife.35946), 2018-05-03
Supplement: supp [file elife-35946-supp-v1.zip]

Archive with 2 entries (2 files):
- elife_poa_e35946_Transparent_Reporting_File.pdf
- elife_poa_e35946_Figure_1_source_data_1.xlsx
