# Supplementary material for: Cryo-EM structure of the adenosine A2A receptor coupled to an engineered heterotrimeric G protein
Source: eLife journal article supplement (doi:10.7554/elife.35946), 2018-05-03
Supplement: supp [file elife-35946-supp-v1.zip › elife_poa_e35946_Figure_1_source_data_1.xlsx]

## Sheet: saturation
	ZM241385 Saturation Binding Data
	A2aR
		[ZM241385]	Total Binding		NS Binding		Total Binding		NS Binding
		(nM)	(DPM)		(DPM)		(fmol)		(fmol)
	Expt 1	23.65	1267	1216	390	361	12.9191	12.3991	3.97668	3.68098
		11.19	1061	1128	197	237	10.8186	11.5018	2.00873	2.4166
		5.12	1148	1000	105	102	11.7057	10.1966	1.07064	1.04005
		2.39	996	821	59	73	10.1558	8.37141	0.6016	0.744352
		1.09	894	845	32	29	9.11577	8.61613	0.326291	0.295702
		0.53	470	483	21	23	4.7924	4.92496	0.214129	0.234522
		0.24	261	249	11	12	2.66131	2.53896	0.112163	0.122359
		0	9	12	12	9	0.0917695	0.122359	0.122359	0.0917695
	Expt 2	23.68	1126	1089	418	375	11.4814	11.1041	4.26218	3.82373
		11.01	1182	1167	193	219	12.0524	11.8994	1.96795	2.23306
		4.67	793	845	111	96	8.08591	8.61613	1.13182	0.978874
		2.23	735	750	38	61	7.49451	7.64745	0.387471	0.621993
		0.98	724	703	29	32	7.38234	7.16821	0.295702	0.326291
		0.48	465	534	18	21	4.74142	5.44499	0.183539	0.214129
		0.24	307	265	20	28	3.13036	2.7021	0.203932	0.285505
		0	11	0	4	11	0.112163	0	0.0407864	0.112163
	TrxA-A2aR
		[ZM241385]	Total Binding		NS Binding		Total Binding		NS Binding
		(nM)	(DPM)		(DPM)		(fmol)		(fmol)
	Expt 1	23.65	880	988	298	393	8.97301	10.0742	3.03859	4.00727
		11.19	797	864	168	235	8.1267	8.80987	1.71303	2.3962
		5.12	584	768	78	132	5.95482	7.83099	0.795335	1.34595
		2.39	559	701	55	45	5.6999	7.14782	0.560813	0.458847
		1.09	423	474	32	34	4.31316	4.83319	0.326291	0.346685
		0.53	268	224	20	25	2.73269	2.28404	0.203932	0.254915
		0.24	162	135	28	27	1.65185	1.37654	0.285505	0.275308
		0	7	14	7	0	0.0713763	0.142753	0.0713763	0
	Expt 2	23.68	696	879	297	239	7.09684	8.96282	3.02839	2.43699
		11.01	705	685	144	103	7.18861	6.98468	1.46831	1.05025
		4.67	550	418	96	69	5.60813	4.26218	0.978874	0.703566
		2.23	642	522	41	39	6.54622	5.32263	0.418061	0.397668
		0.98	394	347	32	23	4.01746	3.53822	0.326291	0.234522
		0.48	215	239	11	20	2.19227	2.43699	0.112163	0.203932
		0.24	87	144	20	18	0.887105	1.46831	0.203932	0.183539
		0	7	14	20	14	0.0713763	0.142753	0.203932	0.142753

## Sheet: competition
	NECA Competition Binding Data
	A2aR
		Log [NECA]	[3H]ZM241385 Binding (DPM)
		(M)	Receptor		Receptor+Gs(R393)
	Expt 1	-4	125	144	100	102
		-5	418	356	87	119
		-6	693	527	119	93
		-7	740	652	159	187
		-8	835	657	280	310
		-9	738	679	360	360
		-10	685	654	433	411
		0	828	621	424	457
	Expt 2	-4	152	130	95	71
		-5	409	366	82	70
		-6	825	597	112	116
		-7	829	752	203	183
		-8	802	659	228	274
		-9	781	692	410	341
		-10	785	658	392	425
		0	789	551	383	371
	TrxA-A2aR
		Log [NECA]	[3H]ZM241385 Binding (DPM)
		(M)	Receptor		Receptor+Gs(R393)
	Expt 1	-4	121	142	99	87
		-5	248	274	100	102
		-6	504	523	120	132
		-7	449	573	261	233
		-8	521	638	465	482
		-9	519	607	568	648
		-10	637	586	646	705
		0	635	592	674	632
	Expt 2	-4	153	96	98	93
		-5	329	310	103	96
		-6	488	529	130	112
		-7	560	565	176	237
		-8	554	611	415	377
		-9	636	538	553	611
		-10	627	679	612	661
		0	515	562	836	692
